# 1 A linguistic representation in the visual system underlies successful lipreading

2 Aaron R Nidiffer<sup>1\*</sup>, Cody Zhewei Cao<sup>2\*</sup>, Aisling O'Sullivan<sup>3</sup>, Edmund C Lalor<sup>1,3†</sup>

3 <sup>1</sup>Dept. of Biomedical Engineering, Dept. of Neuroscience, & Del Monte Institute for Neuroscience,  
4 University of Rochester, Rochester, NY, USA

5 <sup>2</sup>Dept. of Psychology, University of Michigan, Ann Arbor, MI, USA

6 <sup>3</sup>School of Engineering, Trinity College Institute of Neuroscience, & Trinity Centre for Biomedical  
7 Engineering, Trinity College, Dublin, Ireland

8 \* Contributed equally to the work

9 †Corresponding Author: Department of Biomedical Engineering, University of Rochester, 201 Robert B.  
10 Goergen Hall, P.O. Box 270168, Rochester, NY 14627. Edmund\_Lalor@urmc.rochester.edu

## 11 Author Contributions

12 All authors conceived and designed the study. AOS provided stimulus materials and guidance with  
13 analysis. CZC collected data. ARN and CZC analyzed data. ARN and ECL wrote the article. All authors  
14 contributed to revisions and approved the final copy.

## 15 Abstract

16 There is considerable debate over how visual speech is processed in the absence of sound and  
17 whether neural activity supporting lipreading occurs in visual brain areas. Surprisingly, much of this  
18 ambiguity stems from a lack of behaviorally grounded neurophysiological findings. To address this,  
19 we conducted an experiment in which human observers rehearsed audiovisual speech for the  
20 purpose of lipreading silent versions during testing. Using a combination of computational modeling,  
21 electroencephalography, and simultaneously recorded behavior, we show that the visual system  
22 produces its own specialized representation of speech that is 1) well-described by categorical  
23 **linguistic units ("visemes")** 2) dissociable from lip movements, and 3) predictive of lipreading ability.  
24 These findings contradict a long-held view that visual speech processing co-opts auditory cortex after  
25 early visual processing stages. Consistent with hierarchical accounts of visual and audiovisual speech  
26 perception, our findings show that visual cortex performs at least a basic level of linguistic processing.

## 1 Introduction

2 The ability to exchange complex concepts and meaning through oral communication is a defining  
3 feature of human cognition. Although spoken language is primarily transmitted via acoustic signals,  
4 visible cues such as gestures and mouth movements are generated during speech production and  
5 play a prominent role in shaping our speech and language perception. In challenging listening  
6 environments when audible speech becomes contaminated by noise or other distractors, it is almost  
7 instinctual for listeners to look to the face for support. In doing so, both comprehension [1,2] and the  
8 ability to focus attention toward the speaker [3,4] are improved. These benefits are likely mediated in  
9 part by enhanced cortical tracking of speech acoustics [3,5] derived from correlated dynamics of  
10 mouth movements [6,7]. In contrast, visible speech cues can alter the phonemic perception of audible  
11 speech (i.e., the McGurk-McDonald Effect [8]) whereby incongruent audiovisual speech inputs (e.g., a  
12 visible /ga/ and an audible /ba/) combine to produce a percept that is absent in the speech signal (e.g.,  
13 /da/), providing evidence for somewhat independent linguistic representations from acoustic and  
14 visible speech. Moreover, in other situations such as lip-reading, visible cues can form the entire basis  
15 of language comprehension [9].

16 Exactly how vision and the visual system contribute to the reception of spoken language, especially in  
17 very noisy conditions or in the absence of an acoustic cue, is a matter of debate. One view [10–14]  
18 which has garnered renewed attention holds that visual speech perception co-opts the specialized  
19 speech processing machinery of the auditory system and does so in early sensory processing stages  
20 (i.e., after extracting the temporal dynamics of lip movements). Recent accounts propose that auditory  
21 regions can “**synthesize**” a representation of the *unheard* acoustic speech envelope from the temporal  
22 dynamics of lip movements [15], which is possible due to the inherent correlation between acoustic  
23 and visible speech signals [6]. However, this view is complicated by two caveats. First, even when a  
24 speech signal can be heard, cortical envelope tracking does not guarantee comprehension. Although  
25 it does vary with intelligibility [16–18], envelope tracking has been observed during unintelligible  
26 speech [18] and non-speech signals [19]. Envelope tracking is also easily dissociable from  
27 comprehension when the envelope and temporal fine structure do not match (i.e., speech-speech  
28 chimeras [20]) and thus likely reflects general acoustic processing more so than speech processing.  
29 Second, the rise of this view, which was contemporaneous with our emerging understanding of broad  
30 and early multisensory interactions across neocortex [21,22], is consistent with the modulation of  
31 auditory cortical activity by generic (i.e., non-speech) signals from other modalities [23–25] and other  
32 non-specific multisensory enhancements bestowed by correlated temporal dynamics [26–31].  
33 Therefore, it is unclear if visually-evoked envelope tracking in auditory cortex support language  
34 processing or if it simply reflects the dynamics of visual speech meant to enhance the processing of an  
35 acoustic signal that is typically present [7,32].

36 A separate view, supported by a trove of behavioral evidence, suggests that the visual system does its  
37 own heavy lifting during speech perception [33]. According to this perspective, each level of the  
38 speech hierarchy that is conveyed through acoustics are also available to the visual system and visual  
39 cortex contains the necessary machinery to extract and interpret the rich visible cues of speech. This  
40 view is further supported by two independent proposals. One [34] proposes that visual speech  
41 contains two distinct forms of information in relation to acoustic speech, viz. redundant and  
42 complementary information, and another [35] suggests that audiovisual speech processing occurs in a  
43 multistage process that includes early and late components. Redundant cues are those in which vision  
44 echoes the temporal dynamics of the articulatory patterns that form speech (i.e., correlated temporal

1 information contained in lip movements, as discussed above) that are likely integrated in an early  
2 multisensory stage. In contrast, complementary cues supplement under-specified features of the  
3 acoustic speech and convey higher-level information to be integrated with acoustic cues in a late  
4 stage of integration. Phonemes that are easily confused acoustically can often be disambiguated by  
5 their visible articulations (e.g., /b/ and /d/, which begins to explain the McGurk-MacDonald effect).  
6 These complementary visual speech cues – **termed “visemes”** – form a compelling basis for lipreading  
7 [36,37]. It is plausible, if not likely, that visual cortex itself is performing some linguistic processing but  
8 there are few results in the literature that speak directly to how or even whether the different levels of  
9 speech that can be perceived visually [33], are represented in visual cortex. One study suggests that  
10 visual cortex does indeed track these so-called visemes in on-going speech [38] while another [39]  
11 provided evidence that visual cortex can easily discriminate perceptually-distant visemes, hinting at  
12 the idea that visual cortex does indeed perform some level of linguistic processing.

13 Recently, numerous studies have explored how the dynamics of silent visual speech are reflected in  
14 neural data [15,38–42]. In doing so, these studies have made great strides toward our understanding  
15 of the neural underpinnings of visual speech processing. However, their ability to speak to *linguistic*  
16 processing of visual speech comes with some important caveats. They have largely been limited by  
17 **individuals’** naturally poor lipreading skill, which limits the extent of measurable linguistic activity in  
18 the brain; they have often lacked critical behavioral measures, limiting the ability to relate neural  
19 activity to language reception, which is highly variable across individuals [33]; and perhaps most  
20 importantly they often utilize an impoverished proxy measure of visual speech (e.g., the acoustic  
21 speech envelope), which limits the potential to disentangle contributions of different hierarchical  
22 processing stages during the processing of visual speech. In the current experiment, we address these  
23 caveats to probe whether linguistic processing of visual speech occurs in visual cortex. To this end, we  
24 asked human observers to rehearse a set of audiovisual videos of a speaker with the intent of  
25 lipreading them later. We then recorded EEG from the participants as we replayed silent versions of  
26 the rehearsed videos and new set of videos without sound. Finally, we asked participants to detect  
27 target words during the silent videos and asked them to subjectively rate their intelligibility. In our  
28 paradigm, lipreading ability was improved by the rehearsal. We find neurophysiological evidence that  
29 speech-specific (lip movements) and language-specific (visemes) visual features were represented in  
30 separable components of ongoing brain activity. Of all the features we tested, only the linguistic  
31 feature was enhanced by the rehearsal and that enhancement was reflected across participants’  
32 lipreading scores.

- 1 Results
- 2 *Occipital electrode recordings reflect the encoding of linguistic features during silent speech*

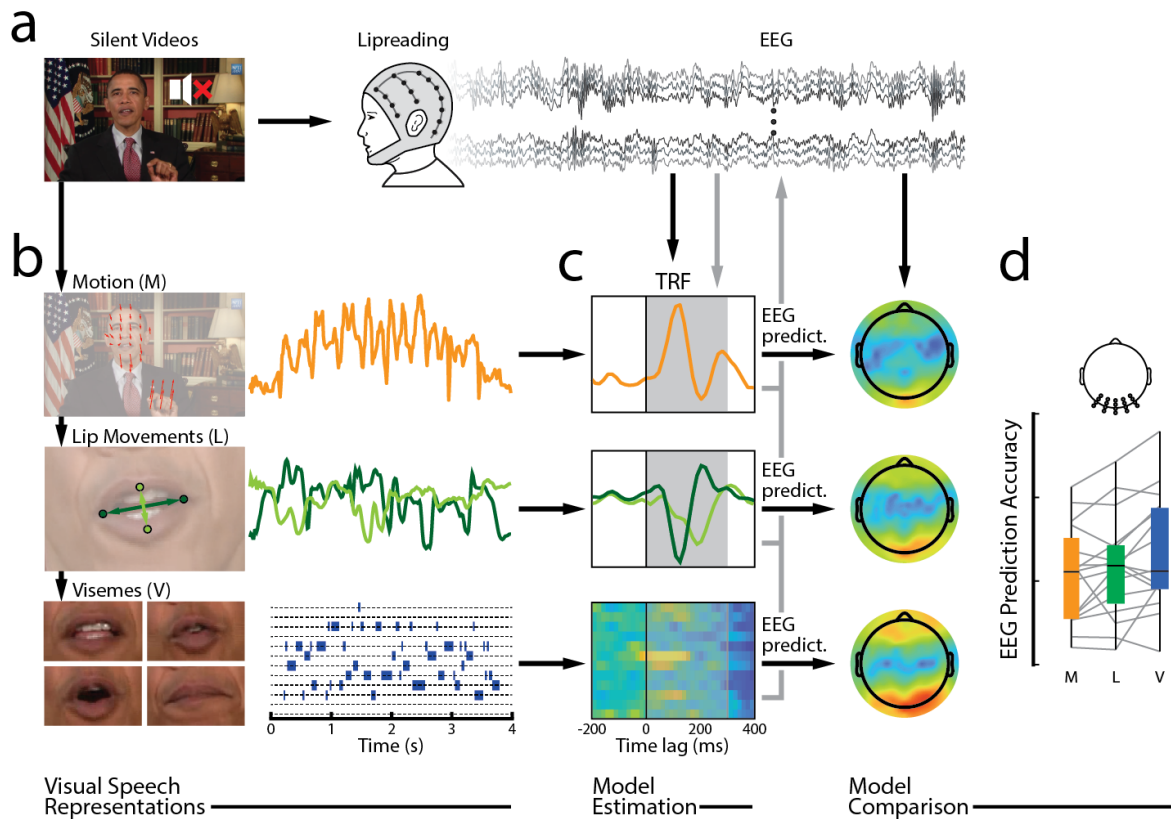

Figure 1 | Modeling different features of visual speech. a. We recorded EEG signals while participants watched minute-long videos of silent speech and attempted to lipread. b. From the videos we extracted several features to serve as regressors in our TRF analysis. c. An extracted feature, or a combination, was regressed against EEG activity across a series of time lags on a subset of data. The resulting TRFs (average across the twenty occipital scalp electrodes shown here) could then be used to predict EEG on left-out data. These predictions could be used to evaluate the models (black arrows) or could be subtracted from the original EEG to remove contributions of that feature (grey arrows) before predicting other features. To standardize the predictions across features, we used the same time lags (0 – 300 ms, grey boxes) for each model prediction. d. To compare across models, we calculated the average prediction accuracy across a set of 20 occipital electrodes.

1 We recorded 128-channel EEG from sixteen  
 2 participants as they watched new and  
 3 previously rehearsed silent videos of  
 4 continuous natural speech of a male speaker  
 5 discussing political and economic topics  
 6 (Figure 1a). To relate their EEG responses to  
 7 the speech, we first extracted several features  
 8 of the visual stimulus (Figure 1b) including  
 9 motion flow (M), vertical and horizontal lip  
 10 movements (L), and a set of 12 visemes (V).  
 11 Using linear modeling, we then derived a  
 12 temporal filter relating each stimulus feature  
 13 to the low-frequency EEG (Figure 1c). This  
 14 filter – the temporal response function (TRF) –  
 15 describes how fluctuations of a stimulus  
 16 feature impacts neural activity across a set of  
 17 time lags and can be envisioned as analogous  
 18 to the more conventional event related  
 19 potential (ERP). Using a cross-validated  
 20 approach, we quantified how well each  
 21 feature was represented in the neural data,  
 22 aiming to directly compare the quality of  
 23 each representation. We fit a TRF using a  
 24 subset of trials and then predicted EEG data  
 25 from left out trials by passing the stimulus  
 26 features of that trial through the TRF. We  
 27 measured the accuracy of predictions,  
 28 channel-by-channel, by calculating Pearson's  
 29 correlation between the real EEG and the  
 30 predicted EEG signals.

31 Our first analysis sought to replicate and extend a previous finding [38] demonstrating that visemes  
 32 are represented in neural activity. Focusing our analysis on 20 electrodes over occipital scalp (Figure  
 33 1d), we quantified the ability of each visual feature to predict EEG activity recorded while participants  
 34 viewed five *previously unseen* silent videos. By comparing these predictions to a permuted null  
 35 distribution, we found that neural activity in occipital electrodes could be reliably predicted by models  
 36 derived visemes (V;  $T(15) = 2.94$ ,  $p = 0.010$ ), lip movements (L;  $T(15) = 4.78$ ,  $p = 0.00024$ , and visual  
 37 motion flow (M;  $T(15) = 4.37$ ,  $p = 0.00054$ ).

38 An important consideration in this analysis is that these features share some temporal structure (i.e.,  
 39 they are correlated). So, to better disentangle the contribution of visemic encoding in neural activity,  
 40 we took a bi-faceted approach. First, in line with similar work in the acoustic domain [43] we  
 41 constructed a family of models consisting of combinations of each feature. The logic behind this  
 42 approach suggests that if a joint-feature model (e.g., ML) out-performs its constituent single-feature  
 43 model (M or L), then EEG indexes the processing of both features. Indeed, we found that when adding  
 44 V to either low-level feature (M or L) or their combination (ML), model performance improved (Figure

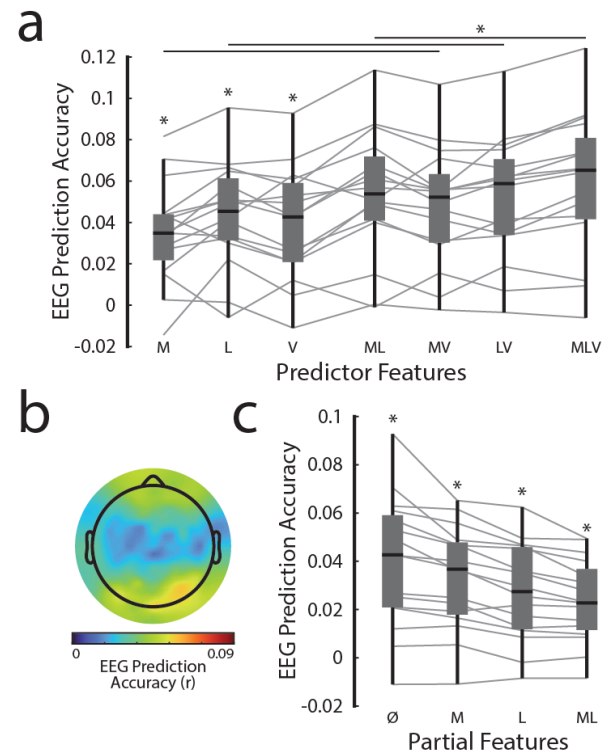

Figure 2 | Visual responses recorded while participants viewed novel **videos reveal the brain's** representation of visemes. a. Comparison of prediction accuracy from the full family of models during novel video presentations. Notably, adding visemes (V) to any model (M, L, or ML) improved EEG predictions, suggesting separable contributions of visemes and the low-level features in brain activity. b. Topographic representation reveal a robust representation of visemes in EEG activity recorded over occipital scalp. The color bar shows the scale of all topographic plots in this article c. Partialing motion (M) and/or lip movements (L) reduced the strength of viseme-based predictions, yet those predictions remained significantly above chance indicating robust viseme tracking.

1 2a: MV vs. M:  $T(15) = 4.26, p = 0.00068$ ; LV vs. L:  $T(15) = 4.55, p = 0.00038$ ; MLV vs. ML:  $T(15) = 4.84, p =$   
2 0.00022). Second, we utilized the predictive power of our TRF analysis to construct and remove  
3 predictions of EEG activity related to lip movements and general motion flow from the EEG signal  
4 [after 44]. This approach effectively eliminates the EEG signature of the partialled-out feature (see  
5 Methods and Table 2). We then predicted the residual EEG using visemes (Figure 2c). The performance  
6 was unsurprisingly lower in these reduced models due to the removal of the covariant activity yet  
7 remained reliably better than shuffled permutations when removing motion flow ( $T(15) = 2.65, p =$   
8 0.018), lip movements ( $T(15) = 2.44, p = 0.028$ ), or both ( $T(15) = 2.15, p = 0.048$ ). Taken together, these  
9 results give support to the idea that visual cortex is capable of modest linguistic processing even with  
10 minimal language comprehension.

### 11 *Successful lipreading reflects improved visual linguistic processing*

12 Prior to the EEG session, we asked participants to  
13 mentally rehearse five videos with sound with the goal  
14 of being able to later identify target words based on  
15 tracking the **speaker's** visible speech articulations.  
16 During the EEG session, participants viewed silent  
17 versions of these rehearsed videos along with the  
18 previously described unseen videos. During each trial,  
19 participants detected target words given at the start of  
20 the trial and gave a subjective intelligibility rating of  
21 that trial at its conclusion. Both the objective  
22 **performance ( $d'$ ;  $T(15) = 3.45, p = 0.0036$ )** and the  
23 subjective intelligibility rating ( $T(15) = 3.27, p = 0.005$ )  
24 were higher for rehearsed videos suggesting that  
25 participants were able to better lip-read those videos  
26 (Figure 3).

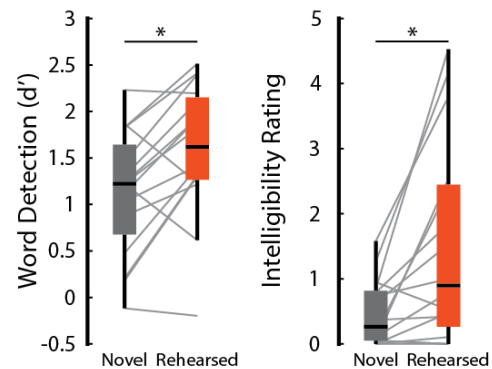

Figure 3 | Speech rehearsal improved lipreading and subjective intelligibility during silent speech. During the silent videos, participants were asked to report their detection of a target word with a button press. After each video, they also rated the subjective intelligibility of the speech. Rehearsal improved both measures across participants.

27 With this evidence that our rehearsal paradigm was  
28 behaviorally successful, we next turned our attention toward **the neural underpinnings of participants'**  
29 improved ability to read lips. First, we compared the prediction accuracy of a family of models across  
30 features and rehearsal conditions. We performed a two-way, repeated measures analysis of variance  
31 (ANOVA) which found significant main effects for both feature ( $F(2,30) = 8.98, p = 0.00088$ ) and  
32 rehearsal condition ( $F(1,15) = 4.80, p = 0.045$ ). Importantly, this analysis also found a significant  
33 interaction ( $F(2,30) = 4.82, p = 0.015$ ), suggesting that rehearsal might be preferentially affecting the  
34 encoding of certain features. Follow-up pairwise comparisons showed that this was indeed the case  
35 (Figure 4a): viseme encoding improved with rehearsal ( $T(15) = 2.96, p = 0.0097$ ) as did motion flow  
36 ( $T(15) = 2.17, p = 0.046$ ), but lip movement encoding did not ( $T(15) = 1.08, p = 0.29$ ). Viseme encoding  
37 was stronger than motion flow ( $T(15) = 3.75, p = 0.0020$ ) and lip movements ( $T(15) = 4.93, p = 0.00033$ )  
38 during the rehearsed videos while visemes ( $T(15) = 2.18, p = 0.046$ ) and lip movements ( $T(15) = 2.17, p$   
39  $= 0.047$ ) were better predictors of EEG than motion flow during novel videos. These results suggest  
40 that rehearsal confers an advantage to the encoding of linguistic features (visemes) but not speech  
41 features (lip movements).

42 As before, we took a complementary and more direct approach to unravel the neural consequence of  
43 rehearsal involving isolating the contribution of a feature of interest by regressing out the

1 contributions of other features. These analyses were necessary to account for correlated structure and  
 2 shared predictive power between the features and to clarify ambiguous findings related to how  
 3 motion flow encoding varies with rehearsal. As expected, there were no rehearsal-based  
 4 improvements to neural tracking of motion flow ( $T(15) = 1.14$ ,  $p = 0.27$ ) or lip movements ( $T(15) = 0.15$ ,  
 5  $p = 0.90$ ) after regressing out the contributions of visemes (Figure 4b). But importantly both features  
 6 were still robustly encoded above chance during both rehearsed (M vs shuffled M:  $T(15) = 5.30$ ,  $p =$   
 7  $0.000089$ ; L vs shuffled L:  $T(15) = 4.80$ ,  $p = 0.00024$ ) and previously unseen videos (M vs shuffled M:  
 8  $T(15) = 4.76$ ,  $p = 0.00026$ ; L vs shuffled L:  $T(15) = 5.31$ ,  $p = 0.000088$ ). Conversely, the benefit of  
 9 rehearsal on viseme tracking remained intact (Figure 4c) after partialing out motion flow ( $T(15) = 3.17$ ,  
 10  $p = 0.0064$ ) and lip movements ( $T(15) = 3.24$ ,  $p = 0.0055$ ) separately and in combination ( $T(15) = 3.47$ ,  $p$   
 11  $= 0.0034$ ). These analyses suggest that although there is likely some neural overlap of the processing  
 12 of visual speech features and visual language, we are able to index them separately and observe that  
 13 linguistic processing is preferentially improved when participants can lipread silent speech.

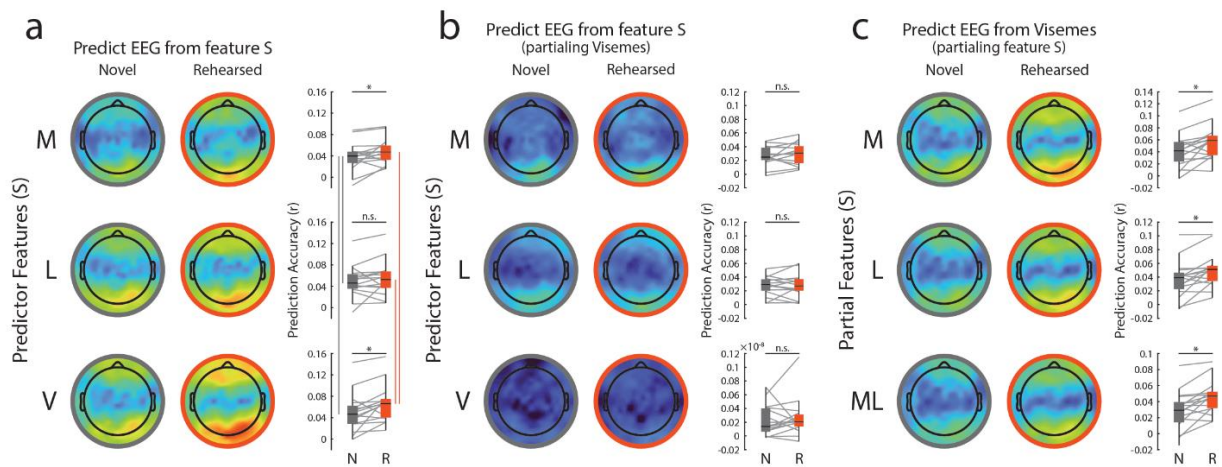

Figure 4 | Visemes are preferentially improved after lip-reading rehearsal. a. Topographic representation of the scalp show EEG prediction accuracy (left) when predicting from each stimulus feature (S = motion [M], lip movements [L], or visemes [V]) during novel (grey) and rehearsed (red) conditions. Box and whisker plots (right) of the average prediction accuracy over a set of 20 occipital electrodes show that rehearsal preferentially improved the representation of visemes. b. Topographic representation of each stimulus features (S = M, L, or V) after partialing visemes from EEG show the contributions of motion flow and lip movements separate from linguistic units. Importantly, we were able to observe residual responses to both low-level features, and neither showed any rehearsal-based enhancement over occipital scalp. **Note the drastic reduction of model performance (~8 orders of magnitude) when predicting visemes from “viseme-free” EEG (bottom; see also Table 2).** c. Topographic representation (left) of the viseme predictions after partialing S (S = M, L, or ML). Box and whisker plots of the average prediction over occipital scalp show that viseme predictions are enhanced by rehearsal even after partialing contributions of other visual features.

14

15 The previous analyses identify viseme tracking over occipital scalp as the likely driver of lipreading  
 16 ability. To explore this possibility more directly, we examined behavioral scores across participants in  
 17 the context of the neural signature of viseme processing. Specifically, we quantified improvement in  
 18 the word detection task and improvements in viseme tracking and tested their relationship. This  
 19 comparison revealed a robust positive correlation (Figure 5a:  $r = 0.60$ ,  $p = 0.015$ ). This relationship was  
 20 not abolished after partialing motion flow ( $r = 0.57$ ,  $p = 0.021$ ), lip movements ( $r = 0.55$ ,  $p = 0.028$ ), or  
 21 both ( $r = 0.52$ ,  $p = 0.040$ ) from the EEG. Thus, we take this as evidence that neural activity specific to  
 22 the processing of visual linguistic information is crucial to supporting lipreading.

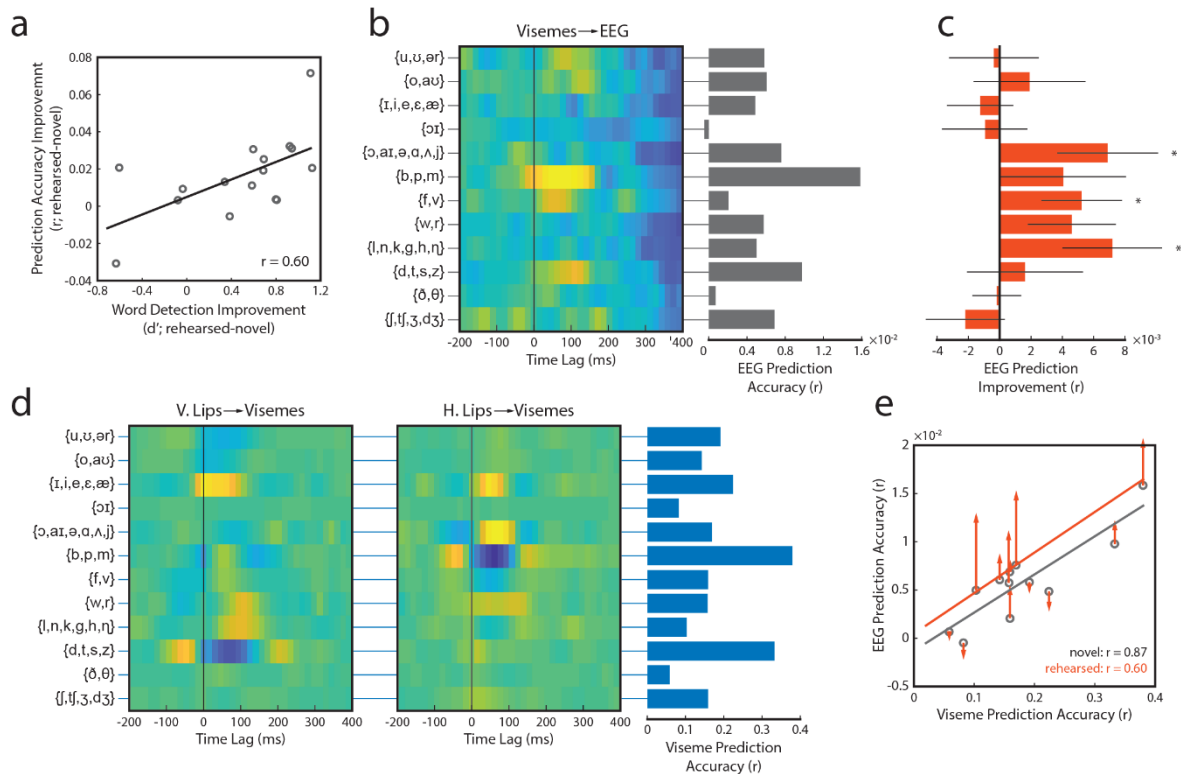

Figure 5 | Individual viseme analysis. a. Across participants, the viseme-based EEG prediction and lipreading improvements related to rehearsal were correlated. b. We fit a multivariate TRF that predicts EEG activity from visemes (left) before separating into individual viseme TRFs and predicting EEG with each. With those univariate TRFs, we predicted left-out EEG data and measured their individual prediction accuracies (right). Shown is prediction accuracy during novel videos. Visemes vary in their individual contribution to the EEG signal. c. Individual viseme encoding improvements conferred by rehearsal. Darker colored bars represent the average improvement across participants and conditions. Three visemes were significantly better EEG predictors after rehearsal. Black line and light shaded region represent the expected improvements based on shuffled permutations. d. We fit TRFs to predict visemes from vertical (left) and horizontal (middle) lip movements. Here, the TRF represents the average lip movements for each viseme. The ability of lip movements to predict visemes (right) were variable across visemes in a manner similar to (b). Dark colored bars represent the average across stimuli while black lines and light shaded regions represent the mean and standard error of shuffled permutations of these predictions. e. The extent that each viseme is encoded in brain activity is largely predicted by how well it is specified by lip movements, especially during novel videos (black line). This relationship is disrupted somewhat by rehearsal (red line), owing to changes (red arrows) that were unrelated to the lip-viseme relationship described in (d).

1  
2 *Specific individual visemes contribute to improved linguistic processing in visual responses*  
3 Having established a connection between lipreading and the neural activity that tracks visemes in  
4 ongoing speech, we undertook an exploratory analysis to unravel contributions of individual viseme  
5 categories. We predicted EEG activity from individual (i.e., univariate) viseme models and evaluated  
6 the strength of those predictions. To account for dependencies between visemes, we first fit a  
7 multivariate viseme TRF (as we've done for all viseme analyses up to this point), then separated that  
8 model into individual univariate TRFs [after 45], and finally predicted left-out EEG data with each  
9 univariate model (Figure 5b, novel shown). We submitted the resultant prediction accuracies to a  
10 repeated-measures ANOVA (with factors viseme category and rehearsal condition). A significant main  
11 effect of viseme category indicated that individual visemes do not contribute equally to the EEG signal  
12 ( $F(11,165) = 11.00, p = 4.1 \times 10^{-15}$ ) with some being more strongly encoded than others. We wondered if  
13 this differential encoding of visemes may be indicative of a mapping between lip movements and



1 visual linguistic units that participants could be reinforcing during the rehearsal. That is, we sought to  
2 reveal any potential relationship between lip movements and visemes and test whether rehearsal  
3 reinforced that representation in brain activity. We fit TRFs that predict visemes from horizontal and  
4 vertical lip movements and found that like EEG predictions from visemes, visemes are differentially  
5 predicted on the basis of lip movements (Figure 5d;  $F(10,140) = 90.01$ ,  $p = 4.69 \times 10^{-56}$ ). Note that we  
6 removed the fourth viseme ( $\{\text{ɔɪ}\}$ ) in this analysis due to its under-representation in four of the fifteen  
7 video clips. In a complementary analysis, we removed those four video clips from the analysis (keeping  
8 all visemes), which yielded the same result ( $F(11,110) = 68.52$ ,  $p = 3.66 \times 10^{-44}$ ). In fact, the degree to  
9 which EEG encodes each viseme individually is highly correlated to how well those visemes are  
10 described by lip movements (Figure 5e, grey line;  $r = 0.87$ ,  $p = 2.04 \times 10^{-4}$ ) for the unrehearsed videos,  
11 suggesting that linguistic processing in the absence of successful lip reading may be largely  
12 attributable to how well lip movements are encoded in brain activity. However, when observers can  
13 successfully lipread, this relationship is perturbed slightly (Figure 5e, red line;  $r = 0.60$ ,  $p = 0.019$ ).  
14 Importantly, this interruption is driven by the enhancement of individual visemes in a manner that is  
15 unrelated to the lip-viseme mapping (Figure 5c and Figure 5e, red arrows;  $r = 0.07$ ,  $p = 0.82$ ),  
16 suggesting rehearsal was not reinforcing this mapping. Specifically, three viseme categories  
17 ( $\{\text{ɔ, aɪ, ə, ɑ, ʌ, j}\}$ ,  $\{f, v\}$ , and  $\{l, n, k, g, h, ŋ\}$ ) drive this enhancement derived from rehearsal ( $T(15) = 2.50, 2.38,$   
18 and  $2.64$ ;  $p = 0.025, 0.031,$  and  $0.019$ , respectively). Taken together, these exploratory analyses suggest  
19 that participants do not simply learn to categorize lip *movements* when they learn to read lips. Instead,  
20 it seems more likely that rehearsal-based improvements rely more on lip *shape*, as suggested by  
21 Campbell [34]. Future studies with better representation of individual visemes and more powerful  
22 analyses will be needed to confirm these findings.

23

## 24 Discussion

25 In the current study, we recorded brain activity over occipital scalp during silent speech and related it  
26 to a set of visual features derived from the speech signal. We were able to isolate the activity related to  
27 linguistic features from activity related to lip movements and other motion present in the videos. In  
28 doing so, we show that this linguistic representation is robustly tracked in ongoing brain activity,  
29 replicating and extending previous work from our group [38]. We found that brief, directed rehearsal  
30 of speech promotes an improvement in lipreading and preferentially improves the representation of  
31 visual linguistic features of that speech. Finally, we linked behavioral improvements across  
32 participants to stronger tracking of linguistic content in visual brain regions, contrary to the  
33 suggestion that lipreading is supported by activity in auditory cortex [10–15].

34 Recently, a flurry of studies have made substantial contributions to our understanding of the neural  
35 processing of visual speech and its contributions to audiovisual speech processing [15,38–42].  
36 Although some provide promising evidence of specialized speech processing in visual cortex  
37 [38,40,41], none have yet to provide a link between *meaningful* reception (i.e., lipreading) and visual  
38 brain activity. For example, several studies have related the tracking of an unheard acoustic envelope  
39 to phonological processing [15,40], though even during acoustic speech reception the specificity of  
40 envelope tracking to linguistic processing is questionable. Neural signals track the envelope of both  
41 non-speech signals [19] and unintelligible speech [18,46]. Envelope tracking does not necessarily  
42 index anything beyond energetic fluctuations [20] since the broadband amplitude envelope derived  
43 from speech signals does not provide enough information to support phonological processing or  
44 comprehension [18,47]. Due to shared dynamics between acoustic envelope and lip movements [6],

1 these visual speech studies are potentially indexing activity related to lip movements, which is not  
2 affected by lipreading according to our findings. One study contrasted forward and reversed visual  
3 speech as a proxy for comprehension [40] although it is unclear if there is any meaningful intelligibility  
4 to be lost by reversing *visual* speech or if neural differences could be explained by the unnatural  
5 temporal dynamics of reversed movement. Another study found that responses to visual speech were  
6 enhanced in mouth-responsive regions in visual cortex [41], yet these enhancements likely represent  
7 attentional preference to task- and context-relevant signals rather than linguistic processing. Finally,  
8 one study indexed linguistic processing directly [38], but provided no measurement of speech  
9 reception. Here we replicate and further validate this previous work from our lab by introducing a  
10 necessary control variable related to lip movements and extra analytical controls.

11 Across each of these studies, the meaningfulness of the reception is uncertain given the lack of  
12 behavioral measurement and when considering how poor and variable human lipreading is [48,49].  
13 Our approach brings a crucial behavioral measure that was lacking in this literature. By relating our  
14 neural findings to simultaneously acquired behavior, we find strong evidence to support a basic level  
15 of linguistic processing in visual cortex. Previous investigators have suggested that a novel area in  
16 visual cortex, which was given the moniker temporal visual speech area (TVSA), exhibits activity  
17 patterns suggestive of specialized speech processing [50]. Using contrasts across several stimulus  
18 conditions, they found no support for specialized speech processing in other brain areas engaged in  
19 processing visual motion (e.g., middle temporal visual area) or face (e.g., fusiform face area) that have  
20 been reported to be active during visible speech [33,51]. We are limited by the (lack of) spatial  
21 resolution of our approach and cannot precisely localize visemic processing to specific visual regions.  
22 However, we were able to dissociate the neural signature of visual linguistic processing from activity  
23 related to lip movements themselves (Figure 4b,c), consistent with findings from Bernstein et al [50],  
24 although their claim stops short of crediting TVSA with visual speech categorization duties. It seems  
25 possible that TVSA is indeed involved in this process. It is also very probable that this process requires  
26 coordination from higher-order brain regions [40]. Regardless, some form of visual linguistic  
27 categorization is evident within visual brain areas.

28 Our findings also corroborate several findings and propositions related to audiovisual speech. Visible  
29 speech cues are important in the context of acoustic speech processing and have been described as  
30 providing two types of information – redundant and complementary – during audiovisual speech  
31 integration [34]. Redundant information refers to the correlated dynamics of visual and acoustic  
32 speech [6]. Visual timing **information can “restore” their degraded acoustic speech correlate** [7,27].  
33 However, the benefits of correlated **visual cues aren’t restricted to speech processing** [52,53], they also  
34 encourage perceptual object formation [54–57], and promote attentional selection [3,4,28,58]. These  
35 effects have been demonstrated in low-level sensory cortex [59]. Therefore, it is likely that visual  
36 dynamics do not provide any linguistic information on their own but need to be transformed into  
37 such. **It’s** becoming clear from the current findings and others [38,39] that visual cortex performs that  
38 transformation, encoding a **representation of visual speech that fulfills Campbell’s complementary**  
39 *mode*. Complementary visual information refers to cues that are underspecified in the acoustic stream  
40 but conveyed more effectively in visible signals. For example, some speech units (e.g., /b/ and /d/ or  
41 /m/ and /n/) can be acoustically ambiguous, especially in noisy conditions, but their visible articulatory  
42 patterns are distinct and robust to noise. Although there is yet to be direct evidence for the  
43 integration of viseme and phoneme cues, indirectly the enhancement of acoustic representations (i.e.,  
44 spectrogram) is similar in noisy and noise-free conditions while the enhancement of phonetic

1 information appears to be more pronounced in noisy conditions [60], consistent with the role of  
2 complementary visual cues.

3 The processing of acoustic speech has been shown to be hierarchically organized, with distinct neural  
4 signatures of different levels of the linguistic hierarchy [43,61–63]. Our findings of separable visual  
5 speech and linguistic components suggest that visual speech perception is similarly hierarchical, at  
6 least up to the basic linguistic units. Together, these findings support the concept of a hierarchical  
7 structure of audiovisual speech integration [34,35]. Early integration and binding [56] may take the  
8 form of redundant visual cues modulating acoustic processing through direct connections between  
9 early visual and auditory cortices [64–66] while late integration may be related to the perceptual  
10 system deriving a language representation by drawing from independent and complementary  
11 acoustic- and visual-based linguistic signals. Further, these dual roles of visual speech may explain the  
12 **concept of the “sweet spot” for audiovisual speech integration** [48]. As speech becomes contaminated  
13 by low to moderate levels of noise, **redundant visual timing cues are able to “restore” features in the**  
14 **acoustic stream** [7] in tandem with an increase weighting of the visual speech representation [67],  
15 leading to a peak in visual enhancement of acoustic speech at a signal-to-noise ratio of about -12 dB.  
16 But as noise levels increase further, the acoustic stream may become too corrupted for visual timing  
17 cues to repair them and observers are forced to rely exclusively on visual speech cues.

18 There are a couple of caveats to our findings that are worth noting. First, it is possible that attention  
19 could explain the improvement in our neural measures [68]. According to this explanation,  
20 participants would be more engaged with a speech video that they were familiar with. Because of the  
21 nature of our rehearsal paradigm, it is impossible to monitor for this effect in behavior. We therefore  
22 performed control analyses to exclude the possibility of an attentional effect. If participants were  
23 attending more to the rehearsed videos, we would expect improved tracking of each of our visual  
24 features in the rehearsed condition [56,69,70]. Yet, even after we leveraged the predictive ability of our  
25 modeling framework to isolate activity specific to each feature, we found no evidence of improved  
26 representation of a general stimulus feature (motion flow) or a more specified task-relevant feature  
27 (lip movements). Any rehearsal-related improvements were consistently restricted to linguistic  
28 representations. We therefore think attentional effects are unlikely to be driving our findings. Second,  
29 it is possible that we are under-characterizing the non-linguistic speech features in our study. We  
30 made a decision to capture the dynamics information related to lip movements than some previous  
31 endeavors (i.e., by measuring horizontal and vertical dimensions [e.g., 15] rather than a one-  
32 dimensional measure of mouth area [e.g., 6,42,58]) due to the correlation between certain dimensions  
33 to distinct acoustic features (e.g., horizontal expansion and contraction co-varying with phonetically-  
34 relevant spectral cues [7]). It is still possible that a more complete characterization of the articulators  
35 (e.g., tongue movements) may account for some of the performance benefit of our viseme model.  
36 Since tongue movements are manifested in speech acoustics, characterizing their dynamics is surely  
37 to be informative on the nature of redundant multisensory interactions. But because the identity of  
38 any particular viseme does not depend on the visibility of the tongue, we think characterizing its  
39 movements is unlikely to account for the activity related to our viseme model or its improvement  
40 derived from lipreading. By their very nature, complementary visual cues such as visemes describe  
41 features orthogonal to speech dynamics, so features that de of speech dynamics or measure that is a  
42 derivative thereof [after 71] is unlikely to fully account for effects ascribed to complementary cues.  
43 Instead, a principled and stimulus-based description of the shape of the articulators is more likely to  
44 be fruitful in this endeavor.

## 1 Conclusions

2 Here, we have provided evidence for specialized categorical linguistic processing in the visual system.  
3 This idea is strongly supported by multitude of behavioral observations suggesting a visual linguistic  
4 structure that reflects its acoustic counterpart [33] but with its own idiosyncratic structure that is a  
5 consequence of phoneme confusion [72,73]. Such a correspondence between auditory and visual  
6 speech processing hierarchies, which itself is a reflection of the common source of acoustic and visual  
7 speech cues, is essential to multistage integration of audiovisual speech [35]. In this multistage  
8 integration, low-level visual cues (such as lip movement dynamics) do have an entry into early  
9 auditory cortex [e.g., 15], but this convergence of *redundant* visual cues likely serves more general,  
10 non-linguistic processes that benefit speech perception: to increase auditory cortical sensitivity to  
11 upcoming events [74], to perceptually restore degraded acoustics [7,27], and to facilitate attentional  
12 selection of auditory signals [3,4,28]. The higher-order *complementary* linguistic representation  
13 demonstrated here is surely a major contributor to the late integration stage of **Peelle's model** where  
14 it would be aptly suited to constrain the inference of the identity of a spoken utterance. Finally, we  
15 find evidence that a rudimentary lipreading ability is supported by the neural tracking of visemes.  
16 Thus, this neural activity may be the brick and mortar of visual language. It will be interesting for  
17 future work to shed light on how the visual system builds upon these basic linguistic representations  
18 and how far the sophistication of spoken language processing in the visual system extends. We also  
19 look forward to understanding the similarities and differences of visual linguistic processing in  
20 lipreaders who are deaf or hard of hearing.

21

## 22 Methods

### 23 *Participants*

24 Sixteen individuals (age =  $25 \pm 6.3$ , 9 females) participated in the current study. All participants  
25 reported normal or corrected-to-normal vision and normal hearing and were right-handed. The study  
26 was conducted in accordance with procedures approved by the University of Rochester Human  
27 Subjects Review Board. Informed written consent was obtained from all participants prior to any  
28 procedures. When applicable, participants were given monetary compensation for participation.

### 29 *Apparatus and Stimuli*

30 The stimuli used in the current experiment consisted of videos of a well-known male speaker. The  
31 **videos contained the speaker's head, shoulders, and chest centered in the frame.** The speech was  
32 conversational and directed at the camera, and the linguistic content focused on political policy.  
33 Fifteen 60-s videos were rendered into 1280 x 720-pixel movies in VideoPad Video Editor (NCH  
34 Software) at 30 frames-per-second. Audio was digitized at 48000 kHz with 16-bit resolution. A very  
35 brief (10 ms) audible click was inserted at the beginning of the audio track for EEG synchronization  
36 (see below).

37 Videos were presented via Presentation Software (Neurobehavioral Systems) on a desktop computer  
38 **running Windows 10. Visual stimuli were presented on a 24" widescreen (16:9) LCD monitor (BenQ**  
39 **ZOWIE XL2411P)** at a refresh rate of 60 Hz. Audible stimuli were presented diotically through a set of  
40 open-back circumaural headphone (Sennheiser HD650) at a moderate listening level. During the  
41 experiment, participants were seated comfortably in a dark, sound-attenuated, and electrically  
42 shielded room (Industrial Acoustics Company) approximately 70 cm from the video screen.

## 1 *Procedure*

2 The experiment was divided into two parts: rehearsal and testing. In the rehearsal phase, five videos  
3 were selected for a participant to learn (randomized across participants). Each of these videos was  
4 presented to the participant ten times in a random order with its accompanying audio soundtrack.  
5 Participants were instructed to watch and listen attentively and were aware that they would be tested  
6 on silent versions of the video after rehearsal. The rehearsal was self-paced with participants  
7 advancing to the next trial with a button press. After rehearsal, participants were offered a 10-minute  
8 break before testing.

9 During the testing phase, we collected EEG from participants as they were presented the same five  
10 videos encountered during testing plus five new videos (also randomized across participants). The  
11 speech audio was stripped from each video (the click was left intact). These silent videos, five  
12 **“rehearsed” and five “novel,” were repeated four times each and their order was randomized. Before**  
13 the presentation of each silent rehearsed video, the same video was played with its audio intact to  
14 **refresh participants’ rehearsal. Prior to each trial**, participants were given a target word to detect in the  
15 upcoming speech. The target word (see Table 1 for a random selection) was unique across repetitions  
16 of a video. Participants were instructed to press the space bar as soon as they perceived the speaker  
17 uttering the target. Presses within 2 seconds of target-word utterances were considered a hit (H) and  
18 all other presses were recorded as false alarms (FA). We calculated a sensitivity index from hit and false  
19 alarm rate using the formula:

$$20 \quad d' = z(H) + z(FA)$$

21 Immediately following each trial, participants were asked to rate the subjective intelligibility of the  
22 speech on a ten-point scale, based on the percentage of words they felt they understood.

23 Table 1. Random selection of target words

|              |           |           |                |
|--------------|-----------|-----------|----------------|
| organization | decade    | political | healthcare     |
| influence    | congress  | hospital  | foreign        |
| cost         | special   | citizen   | administration |
| people       | plan      | funding   | issue          |
| economy      | stability | profit    | lower          |

24

## 25 *EEG Acquisition and Preprocessing*

26 Continuous EEG data were acquired (Figure 1a) using an ActiveTwo system (BioSemi) from 128 scalp  
27 electrodes + 2 reference electrodes adhered to the skin over the mastoids. The data were low pass  
28 filtered online below 134 Hz and digitized at a rate of 512 Hz. Triggers were sent by an Arduino Uno  
29 microcontroller which detected the audio click at the start of each soundtrack to indicate the start of  
30 each trial. Subsequent pre-processing was conducted offline in MATLAB: the data were imported and  
31 re-referenced to the average reference, bandpass filtered between 0.3 Hz and 15 Hz, and noisy  
32 channels were interpolated. To identify channels with excessive noise, the time series were visually  
33 inspected in Cartool [75], and the standard deviation of each channel was compared with that of the  
34 surrounding channels in MATLAB. Channels contaminated by noise (twice the average standard  
35 deviation of the surrounding electrodes) were replaced by spline-interpolating the remaining clean  
36 channels with weightings based on their relative scalp location in EEGLAB [76]. Finally, the EEG was  
37 epoched and downsampled to 64 Hz.

## 1 *Speech Representations*

2 To investigate the links between visual speech and low frequency EEG, we quantified a set of features  
3 intended to capture the information in redundant and complementary cues [34] (Figure 1b). As a  
4 measure of the redundant visual cue, we extract lip movements (L) using **the Face Tracker's Detailed**  
5 **Features** mode in Adobe After Effects, which provided x- and y-coordinates of a series of facial  
6 landmarks (namely the center of both lips, corners of the mouth, nose, chin, and both cheeks). A time-  
7 series of Euclidean distances between the center of the upper and lower lips defined vertical mouth  
8 movements while the distances between the left and right corners of the mouth defined horizontal  
9 mouth movements. To account for occasional changes in the camera position we divided vertical lip  
10 distance obtained in each frame by the average nose-to-chin distance during the current camera  
11 position. Horizontal movements were similarly normalized by the average cheek-to-cheek distance. To  
12 capture complementary visual information, we labeled the occurrence of visemes (V) during the  
13 speech. Visemes are defined in terms of groupings of phonemes based on perceptual similarity  
14 [72,73]. To derive this visemic representation for our videos, we first obtained their phonemic  
15 representation [after 43], and mapped each of the 39 phonemes to one of 12 visemes based on the  
16 correspondence defined by Auer and Bernstein [37]. There are fewer visemes than phonemes because  
17 of the difficulty of distinguishing, for example, a /p/ from a /b/ visually. We also quantified a control  
18 measure, motion flow (M), to capture general visual motion in the scene. Briefly [after 38], for each  
19 **frame, a matrix of motion vectors was calculated using an "Adaptive Rood Pattern Search" block**  
20 **matching algorithm [77]. Motion flow was the sum of all motion vector lengths in each frame [78]. This**  
21 **unweighted sum theoretically could contain both "global motion" (attributable to locomotion or gaze**  
22 **shift) and "local motion" (attributable to external movements), we assume the contribution to this**  
23 **feature from "global motion" was minimal due to the camera remaining stationary relative to the**  
24 **speaker aside from occasional cuts. This signal was then upsampled from 30 Hz to 64 Hz to match the**  
25 **rate of the EEG data. Continuous features – motion flow and lip movements – were normalized by**  
26 **taking their z-score along the time dimension. Visemes were represented as discrete binary variables**  
27 **indicating the presence (1, blue in Figure 1b) or absence (0) of each viseme at a given time point.**

## 28 *Temporal Response Function Analysis*

29 In order to relate continuous EEG to the speech representations introduced above, we used a ridge  
30 regression analysis that describes the mapping from a stimulus feature of interest to the EEG response  
31 in each electrode. This mapping, known as a Temporal Response Function (TRF), was computed and  
32 cross-validated using a custom-built toolbox in MATLAB [79]. Because the effect of an event in the  
33 environment is not evident in brain activity until after the event and lasts for several hundred  
34 milliseconds, we compute the TRF across a series of time lags. To normalize TRFs for comparison  
35 across stimulus features, we selected a range of time lags (0-300ms; Figure 1c, shaded regions) that  
36 contained the major components of the TRF across features. We constructed a family of TRF models  
37 derived from single features or combinations of features and measured their ability to predict new  
38 EEG data to estimate the representation of each stimulus feature, or combination of features (Figure  
39 **1d). Prediction accuracy was measured as the Pearson's correlation between the observed and**  
40 **predicted EEG signals. Where applicable, TRF prediction accuracies were tested against a null**  
41 **distribution generated by iteratively fitting TRFs on shuffled stimulus/response pairings and then**  
42 **evaluating on matched data.**

43 Due to inherent correlations between stimulus features, it was necessary to isolate the effects of single  
44 features. To this end, before fitting and evaluating TRFs as described above, we partialled out the

1 contributions of other features from the EEG using the following procedure. First, TRFs were fit to the  
2 to-be-partialled feature(s). These TRFs were then used to generate EEG predictions which were  
3 subtracted from the original EEG signal. The resultant residual EEG was then used in place of the  
4 original EEG in further TRF analyses as described above (Figure 1c, grey arrows). To quantify how well  
5 the partialing procedure worked, we measured how well a feature (M, L, or V) can predict residual EEG  
6 after partialing ( $pa_{res}$ ; data for V are shown in figure 4b, bottom row). Although the partialing  
7 procedure did not reduce prediction accuracy to the level of the noise floor ( $pa_{res,null}$ ; all  $T(15) > 2.40$ ; all  
8  $p < 0.03$ ), it does substantially reduce prediction accuracy (Table 2) compared to predicting the  
9 original EEG ( $pa_{full}$ ; values from data shown in figure 4a) we calculated this reduction as:

$$10 \quad \frac{(pa_{res} - pa_{full})}{pa_{res}} \times 100$$

11 Table 2. Mean prediction accuracy across occipital channels before and after partialing procedure, the  
12 respective percent change, and the noise floor.

|   | novel       |                      |           |                      | rehearsed   |                      |          |                       |
|---|-------------|----------------------|-----------|----------------------|-------------|----------------------|----------|-----------------------|
|   | $pa_{full}$ | $pa_{res}$           | % change  | $pa_{res,null}$      | $pa_{full}$ | $pa_{res}$           | % change | $pa_{res,null}$       |
| M | 0.039       | $6.1 \times 10^{-8}$ | -99.99998 | $1.5 \times 10^{-9}$ | 0.048       | $1.1 \times 10^{-7}$ | -99.9998 | $5.9 \times 10^{-11}$ |
| L | 0.049       | 0.00031              | -99.38    | $9.0 \times 10^{-6}$ | 0.054       | 0.00030              | -99.51   | $5.4 \times 10^{-6}$  |
| V | 0.049       | $2.2 \times 10^{-6}$ | -99.994   | $8.4 \times 10^{-8}$ | 0.065       | $2.7 \times 10^{-6}$ | -99.997  | $1.3 \times 10^{-7}$  |

13

#### 14 Acknowledgements

15 The work and author ARN were supported by NIH grant DC016297 to ECL. Additional support was  
16 provided by a Science Foundation Ireland Career Development Award (CDA/15/3316) to ECL. We  
17 would like to give a special thanks to Lauren Szymula for help with data collection and to Dr. David  
18 Simon for numerous discussions that added substantial value to the manuscript.

#### 19 Competing Interests

20 The authors declare that they have no competing interests, financial or otherwise.

## 1 References

- 2 1. Sumbly WH, Pollack I: Visual Contribution to Speech Intelligibility in Noise. *J Acoust Soc Am*  
3 1954, 26:212–215.
- 4 2. Erber NP: Interaction of audition and vision in the recognition of oral speech stimuli. *J*  
5 *Speech Lang Hear Res* 1969, 12:423.
- 6 3. Zion Golumbic E, Cogan GB, Schroeder CE, Poeppel D: Visual input enhances selective  
7 **speech envelope tracking in auditory cortex at a “Cocktail Party.”** *J Neurosci* 2013,  
8 33:1417–1426.
- 9 4. O’Sullivan AE, Lim CY, Lalor EC: **Look at me when I’m talking to you: Selective attention at a**  
10 multisensory cocktail party can be decoded using stimulus reconstruction and alpha  
11 power modulations. *Eur J Neurosci* 2019, 50.
- 12 5. Crosse MJ, Butler JS, Lalor EC: Congruent Visual Speech Enhances Cortical Entrainment to  
13 Continuous Auditory Speech in Noise-Free Conditions. *J Neurosci* 2015, 35:14195–14204.
- 14 6. Chandrasekaran C, Trubanova A, Stillittano S, Caplier A, Ghazanfar AA: The natural statistics of  
15 audiovisual speech. *PLoS Comput Biol* 2009, 5.
- 16 7. Plass J, Brang D, Suzuki S, Grabowecky M: Vision perceptually restores auditory spectral  
17 dynamics in speech. *Proc Natl Acad Sci U S A* 2020, 117:16920–16927.
- 18 8. McGurk H, Macdonald J: Hearing lips and seeing voices. *Nature* 1976, 264:746–748.
- 19 9. Andersson U, Lyxell B, Rönnerberg J, Spens K: Cognitive Correlates of Visual Speech  
20 Understanding in Hearing-Impaired Individuals. *J Deaf Stud Deaf Educ* 2001, 6:103–116.
- 21 10. Sams M, Aulanko R, Hämäläinen M, Hari R, Lounasmaa O V., Lu ST, Simola J: Seeing speech:  
22 visual information from lip movements modifies activity in the human auditory cortex.  
23 *Neurosci Lett* 1991, 127:141–145.
- 24 11. Calvert GA, Bullmore ET, Brammer MJ, Campbell R, Williams SCR, McGuire PK, Woodruff PWR,  
25 Iversen SD, David AS: Activation of auditory cortex during silent lipreading. *Science (80-*  
26 *1997, 276:593–596.*
- 27 12. Ludman CN, Summerfield AQ, Hall D, Elliott M, Foster J, Hykin JL, Bowtell R, Morris PG: Lip-  
28 reading ability and patterns of cortical activation studied using fMRI. *Br J Audiol* 2000,  
29 34:225–230.
- 30 13. Pekkola J, Ojanen V, Autti T, Jääskeläinen IP, Möttönen R, Tarkiainen A, Sams M: Primary  
31 auditory cortex activation by visual speech: An fMRI study at 3 T. *Neuroreport* 2005,  
32 doi:10.1097/00001756-200502080-00010.
- 33 14. Besle J, Fischer C, Bidet-Caulet A, Lecaigard F, Bertrand O, Giard MH: Visual activation and  
34 audiovisual interactions in the auditory cortex during speech perception: Intracranial  
35 recordings in humans. *J Neurosci* 2008, 28:14301–14310.
- 36 15. Bourguignon M, Baart M, Kapnoula EC, Molinaro N: Lip-reading enables the brain to  
37 synthesize auditory features of unknown silent speech. *J Neurosci* 2020, 40:1053–1065.
- 38 16. Luo H, Poeppel D: Phase Patterns of Neuronal Responses Reliably Discriminate Speech in



- 1 Human Auditory Cortex. *Neuron* 2007, 54:1001–1010.
- 2 17. Etard O, Reichenbach T: Neural Speech Tracking in the Theta and in the Delta Frequency  
3 Band Differentially Encode Clarity and Comprehension of Speech in Noise. *J Neurosci* 2019,  
4 39:5750–5759.
- 5 18. Peelle JE, Gross J, Davis MH: Phase-Locked Responses to Speech in Human Auditory Cortex  
6 are Enhanced During Comprehension. *Cereb Cortex* 2013, 23:1378–1387.
- 7 19. Lalor EC, Power AJ, Reilly RB, Foxe JJ: Resolving Precise Temporal Processing Properties of  
8 the Auditory System Using Continuous Stimuli. *J Neurophysiol* 2009,  
9 doi:10.1152/jn.90896.2008.
- 10 20. Prinsloo KD, Lalor EC: General auditory and speech-specific contributions to cortical  
11 envelope tracking revealed using auditory chimeras. *bioRxiv* 2020,  
12 doi:10.1101/2020.10.21.348557.
- 13 21. Schroeder CE, Foxe J: Multisensory contributions to low-**level, “unisensory” processing**.  
14 *Curr Opin Neurobiol* 2005, 15:454–458.
- 15 22. Ghazanfar AA, Schroeder CE: Is neocortex essentially multisensory? *Trends Cogn Sci* 2006,  
16 10:278–285.
- 17 23. Kayser C, Petkov CI, Logothetis NK: Visual modulation of neurons in auditory cortex. *Cereb*  
18 *Cortex* 2008, 18:1560–1574.
- 19 24. Lemus L, Hernández A, Luna R, Zainos A, Romo R: Do sensory cortices process more than one  
20 sensory modality during perceptual judgments? *Neuron* 2010, 67:335–348.
- 21 25. Cohen L, Rothschild G, Mizrahi A: Multisensory integration of natural odors and sounds in  
22 the auditory cortex. *Neuron* 2011, 72:357–369.
- 23 26. Parise C V., Ernst MO: Correlation detection as a general mechanism for multisensory  
24 integration. *Nat Commun* 2016, 7:364.
- 25 27. Grant KW, Seitz PFP: The use of visible speech cues for improving auditory detection of  
26 spoken sentences. *J Acoust Soc Am* 2000, 108:1197–1208.
- 27 28. Maddox RK, Atilgan H, Bizley JK, Lee AK: Auditory selective attention is enhanced by a task-  
28 irrelevant temporally coherent visual stimulus in human listeners. *Elife* 2015, 2015:1–11.
- 29 29. Hershenson M: Reaction time as a measure of intersensory facilitation. *J Exp Psychol* 1962,  
30 63:289–293.
- 31 30. Colonius H, Diederich A: Multisensory Interaction in Saccadic Reaction Time: A Time-  
32 Window-of-Integration Model. *J Cogn Neurosci* 2004, 16:1000–1009.
- 33 31. Frassinetti F, Bolognini N, Làdavas E: Enhancement of visual perception by crossmodal  
34 visuo-auditory interaction. *Exp Brain Res* 2002, 147:332–343.
- 35 32. Metzger BA, Magnotti JF, Wang Z, Nesbitt E, Karas PJ, Yoshor D, Beauchamp MS: Responses to  
36 visual speech in human posterior superior temporal gyrus examined with iEEG  
37 deconvolution. *J Neurosci* 2020, 40:6938–6948.

- 1 33. Bernstein LE, Liebenthal E: Neural pathways for visual speech perception. *Front Neurosci*  
2 2014, 8:386.
- 3 34. Campbell R: The processing of audio-visual speech: empirical and neural bases. *Philos Trans*  
4 *R Soc B Biol Sci* 2008, 363:1001–1010.
- 5 35. Peelle JE, Sommers MS: Prediction and constraint in audiovisual speech perception. *Cortex*  
6 2015, 68:169–181.
- 7 36. Dodd B: The role of vision in the perception of speech. *Perception* 1977, 6:31–40.
- 8 37. Auer ET, Bernstein LE: Speechreading and the structure of the lexicon: Computationally  
9 modeling the effects of reduced phonetic distinctiveness on lexical uniqueness. *J Acoust*  
10 *Soc Am* 1997, 102:3704–3710.
- 11 38. **O’Sullivan AE, Crosse MJ, Di Liberto GM, Lalor EC: Visual Cortical Entrainment to Motion and**  
12 **Categorical Speech Features during Silent Lipreading.** *Front Hum Neurosci* 2017, 10:679.
- 13 39. Files BT, Auer ET, Bernstein LE: The visual mismatch negativity elicited with visual speech  
14 stimuli. *Front Hum Neurosci* 2013, 7:371.
- 15 40. Hauswald A, Lithari C, Collignon O, Leonardelli E, Weisz N: A Visual Cortical Network for  
16 Deriving Phonological Information from Intelligible Lip Movements. *Curr Biol* 2018,  
17 28:1453-1459.e3.
- 18 41. Ozker M, Yoshor D, Beauchamp MS: **Frontal cortex selects representations of the talker’s**  
19 **mouth to aid in speech perception.** *Elife* 2018, 7.
- 20 42. Mégevand P, Mercier MR, Groppe DM, Zion Golumbic E, Mesgarani N, Beauchamp MS,  
21 Schroeder CE, Mehta AD: Crossmodal phase reset and evoked responses provide  
22 complementary mechanisms for the influence of visual speech in auditory cortex. *J*  
23 *Neurosci* 2020, doi:10.1523/JNEUROSCI.0555-20.2020.
- 24 43. **Di Liberto GM, O’Sullivan JA, Lalor EC: Low-frequency cortical entrainment to speech**  
25 **reflects phoneme-level processing.** *Curr Biol* 2015, 25:2457–2465.
- 26 44. Bednar A, Lalor EC: Where is the cocktail party? Decoding locations of attended and  
27 unattended moving sound sources using EEG. *Neuroimage* 2020, 205:116283.
- 28 45. Nunez-Elizalde AO, Huth AG, Gallant JL: Voxelwise encoding models with non-spherical  
29 multivariate normal priors. *Neuroimage* 2019, 197:482–492.
- 30 46. Howard MF, Poeppel D: Discrimination of Speech Stimuli Based on Neuronal Response  
31 Phase Patterns Depends on Acoustics But Not Comprehension. *J Neurophysiol* 2010,  
32 104:2500–2511.
- 33 47. Smith ZM, Delgutte B, Oxenham AJ: Chimaeric sounds reveal dichotomies in auditory  
34 perception. *Nature* 2002, 416:87–90.
- 35 48. Ross LA, Saint-Amour D, Leavitt VM, Javitt DC, Foxe JJ: Do you see what I am saying?  
36 Exploring visual enhancement of speech comprehension in noisy environments. *Cereb*  
37 *Cortex* 2007, 17:1147–1153.
- 38 49. Bernstein LE, Demorest ME, Tucker PE: Speech perception without hearing. *Percept*

- 1            *Psychophys* 2000, 62:233–252.
- 2    50.    Bernstein LE, Jiang J, Pantazis D, Lu Z-L, Joshi A: Visual phonetic processing localized using  
3            speech and nonspeech face gestures in video and point-light displays. *Hum Brain Mapp*  
4            2011, 32:1660–1676.
- 5    51.    Calvert GA, Campbell R: Reading speech from still and moving faces: The neural substrates  
6            of visible speech. *J Cogn Neurosci* 2003, 15:57–70.
- 7    52.    Nidiffer AR, Diederich A, Ramachandran R, Wallace MT: Multisensory perception reflects  
8            individual differences in processing temporal correlations. *Sci Rep* 2018, 8.
- 9    53.    Parise C V., Spence C, Ernst MO: When correlation implies causation in multisensory  
10           integration. *Curr Biol* 2012, 22:46–49.
- 11   54.    Nozaradan S, Peretz I, Mouraux A: Steady-state evoked potentials as an index of  
12           multisensory temporal binding. *Neuroimage* 2012, 60:21–28.
- 13   55.    Parise C V, Harrar V, Ernst MO, Spence C: Cross-correlation between Auditory and Visual  
14           Signals Promotes Multisensory Integration. *Multisens Res* 2013, 26:1–10.
- 15   56.    Bizley JK, Maddox RK, Lee AK: Defining Auditory-Visual Objects: Behavioral Tests and  
16           Physiological Mechanisms. *Trends Neurosci* 2016, 39:74–85.
- 17   57.    Nidiffer AR, Ramachandran R, Wallace MT: Multisensory binding is driven by the strength of  
18           stimulus correlation. *PsyArXiv* 2020, doi:10.31234/osf.io/vzbmw.
- 19   58.    Park H, Kayser C, Thut G, Gross J: **Lip movements entrain the observers’ low**-frequency brain  
20           oscillations to facilitate speech intelligibility. *Elife* 2016, 5:e14521.
- 21   59.    Atilgan H, Town SM, Wood KC, Jones GP, Maddox RK, Lee AKC, Bizley JK: Integration of Visual  
22           Information in Auditory Cortex Promotes Auditory Scene Analysis through Multisensory  
23           Binding. *Neuron* 2018, 97:640-655.e4.
- 24   60.    **O’Sullivan A, Crosse M, Di Liberto G, de Cheveigné A, Lalor E**: Neurophysiological indices of  
25           audiovisual speech integration are enhanced at the phonetic level for speech in noise.  
26           *bioRxiv* 2020, doi:10.1101/2020.04.18.048124.
- 27   61.    Blank I, Balewski Z, Mahowald K, Fedorenko E: Syntactic processing is distributed across the  
28           language system. *Neuroimage* 2016, 127:307–323.
- 29   62.    Broderick MP, Anderson AJ, Lalor EC: Semantic Context Enhances the Early Auditory  
30           Encoding of Natural Speech. *J Neurosci* 2019, doi:10.1523/JNEUROSCI.0584-19.2019.
- 31   63.    Anderson AJ, Binder JR, Fernandino L, Humphries CJ, Conant LL, Raizada RDS, Lin F, Lalor EC: An  
32           Integrated Neural Decoder of Linguistic and Experiential Meaning. *J Neurosci* 2019,  
33           39:8969–8987.
- 34   64.    Cappe C, Barone P: Heteromodal connections supporting multisensory integration at low  
35           levels of cortical processing in the monkey. *Eur J Neurosci* 2005, 22:2886–2902.
- 36   65.    Bizley JK, Nodal FR, Bajo VM, Nelken I, King AJ: Physiological and anatomical evidence for  
37           multisensory interactions in auditory cortex. *Cereb Cortex* 2007, 17:2172–2189.

- 1 66. Falchier A, Schroeder CE, Hackett TA, Lakatos P, Nascimento-Silva S, Ulbert I, Karmos G, Smiley  
2 JF: Projection from Visual Areas V2 and Prostriata to Caudal Auditory Cortex in the  
3 Monkey. *Cereb Cortex* 2010, 20:1529–1538.
- 4 67. Nath AR, Beauchamp MS: Dynamic changes in superior temporal sulcus connectivity  
5 during perception of noisy audiovisual speech. *J Neurosci* 2011, 31:1704–1714.
- 6 68. Bisley JW: The neural basis of visual attention. *J Physiol* 2011, 589:49–57.
- 7 69. Shinn-Cunningham BG: Object-based auditory and visual attention. *Trends Cogn Sci* 2008,  
8 12:182–186.
- 9 70. Desimone R, Duncan J: Neural Mechanisms of Selective Visual Attention. *Annu Rev Neurosci*  
10 1995, 18:193–222.
- 11 71. Daube C, Ince RAA, Gross J: Simple Acoustic Features Can Explain Phoneme-Based  
12 Predictions of Cortical Responses to Speech Article Simple Acoustic Features Can Explain  
13 Phoneme-Based Predictions of Cortical Responses to Speech. *Curr Biol* 2019, 29:1924-  
14 1937.e9.
- 15 72. Woodward MF, Barber CG: Phoneme Perception in Lipreading. *J Speech Hear Res* 1960, 3:212–  
16 222.
- 17 73. Fisher CG: Confusions among visually perceived consonants. *J Speech Hear Res* 1968,  
18 11:796–804.
- 19 74. ten Oever S, Schroeder CE, Poeppel D, van Atteveldt N, Zion-Golumbic E: Rhythmicity and  
20 cross-modal temporal cues facilitate detection. *Neuropsychologia* 2014, 63:43–50.
- 21 75. Brunet D, Murray MM, Michel CM: Spatiotemporal analysis of multichannel EEG: CARTOOL.  
22 *Comput Intell Neurosci* 2011, 2011.
- 23 76. Delorme A, Makeig S: EEGLAB: An open source toolbox for analysis of single-trial EEG  
24 dynamics including independent component analysis. *J Neurosci Methods* 2004, 134:9–21.
- 25 77. Barjatya A: Block matching algorithms for motion estimation. *IEEE Trans Evol Comput* 2004,  
26 8:225–239.
- 27 78. Bartels A, Zeki S, Logothetis NK: Natural vision reveals regional specialization to local  
28 motion and to contrast-invariant, global flow in the human brain. *Cereb Cortex* 2008,  
29 18:705–717.
- 30 79. Crosse MJ, Di Liberto GM, Bednar A, Lalor EC: The Multivariate Temporal Response Function  
31 (mTRF) Toolbox: A MATLAB Toolbox for Relating Neural Signals to Continuous Stimuli.  
32 *Front Hum Neurosci* 2016, 10:604.
